# Supplementary material for: Direct conversion of C6 sugars to methyl glycerate and glycolate in methanol
Source: Royal Society of Chemistry journal article supplement (doi:10.1039/c8ra05612a), 2018-01-01
Supplement: c8ra05612a1.pdf [file c8ra05612a1.pdf]

**Supporting information**

**Direct Conversion of C6 Sugars to Methyl Glycerate and Glycolate in  
Methanol**

Lei Feng, Gang Li, Yueer Yan, Wenrong Hou, Yahong Zhang\* and Yi Tang\*

Department of Chemistry, Shanghai Key Laboratory of Molecular Catalysis and  
Innovative Materials, Laboratory of Advanced Materials, Collaborative Innovation  
Centre of Chemistry for Energy Materials (*iChEM*), Fudan University, Shanghai  
200433, China

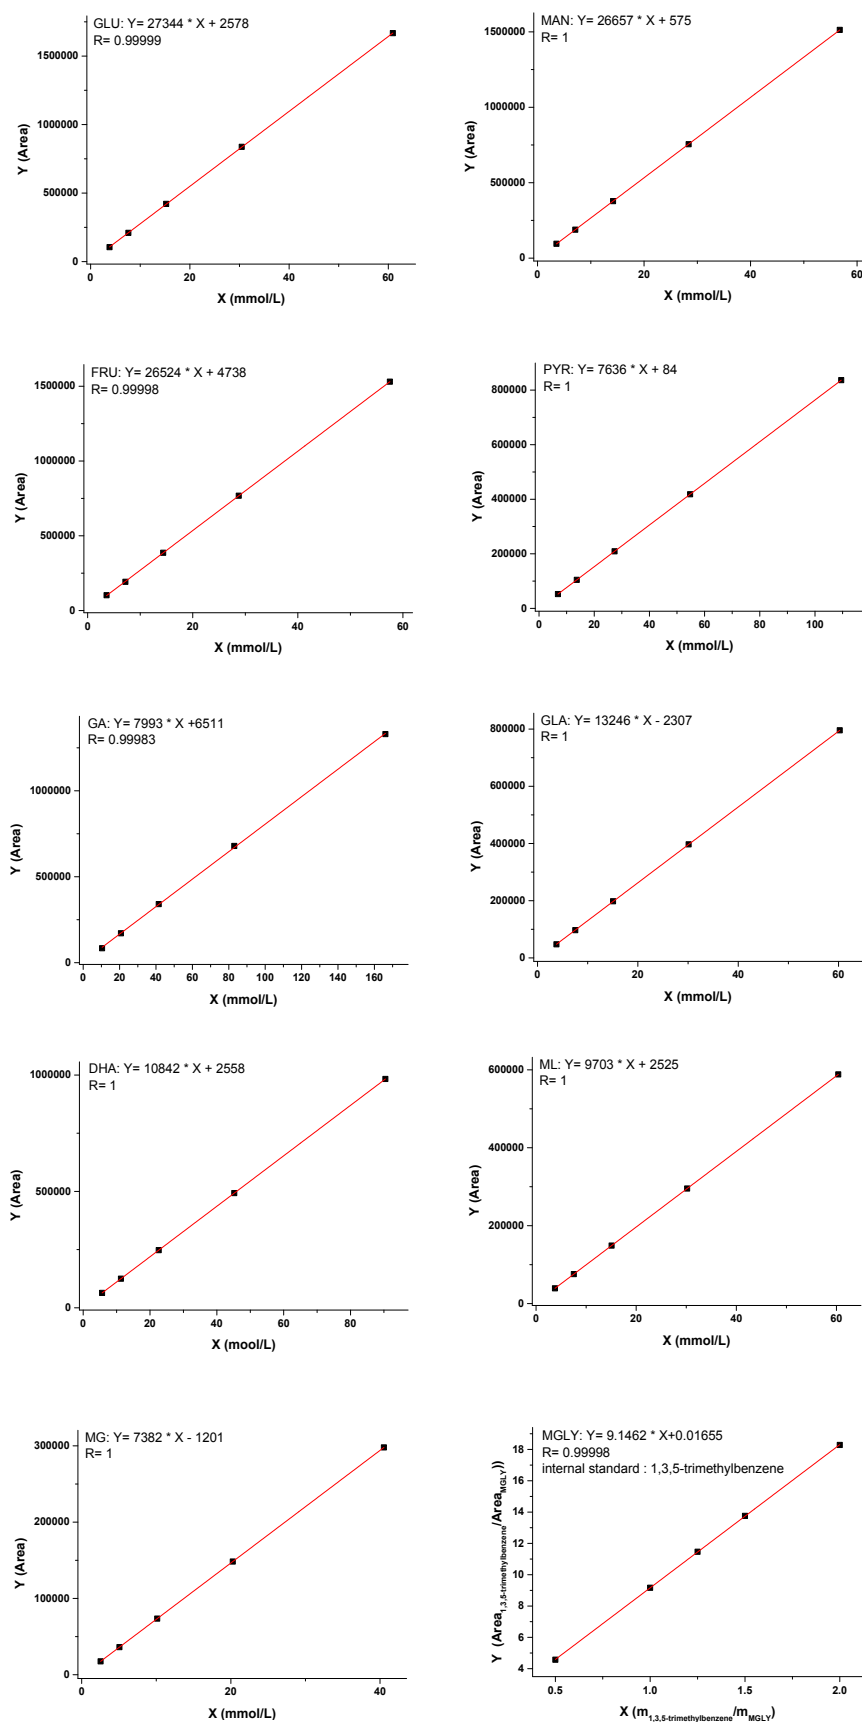

Fig. S1. Standard curves of all substrates and products

Table S1

Conversion of GA to MG catalyzed by different catalyst.

| Cat.                | t.<br>(h) | Conv.<br>(mol%) | Product yield (C mol%) |      | Carbon<br>balance (mol%) |
|---------------------|-----------|-----------------|------------------------|------|--------------------------|
|                     |           |                 | Others                 | MG   |                          |
| Pt/C                | 1         | 15.8            | 3.0                    | 6.1  | 93.3                     |
|                     | 2         | 31.9            | 13.7                   | 7.4  | 89.2                     |
| Pd/C                | 1         | 45.3            | 5.8                    | 33.6 | 94.1                     |
|                     | 2         | 51.4            | 2.9                    | 36.2 | 87.7                     |
| Ru/C                | 1         | 9.1             | 4.9                    | 0    | 95.8                     |
|                     | 2         | 16.2            | 7.6                    | 0    | 91.4                     |
| Au/TiO <sub>2</sub> | 0.5       | 97.4            | 9.6                    | 82.7 | 94.9                     |
|                     | 1         | 98.8            | 5.5                    | 84.8 | 91.5                     |

Reaction condition: 50 mg of GA, 5 g of methanol, 100 mg of catalyst, 393 K, 1 MPa O<sub>2</sub>. Yields of MG and others are calculated by carbon atom yield from GA. Carbon balance is calculated by  $[1 - \text{Conv.} + Y_{\text{MG}} + Y_{\text{Others}}] \times 100\%$ , others: FRU, PYR, DHA.

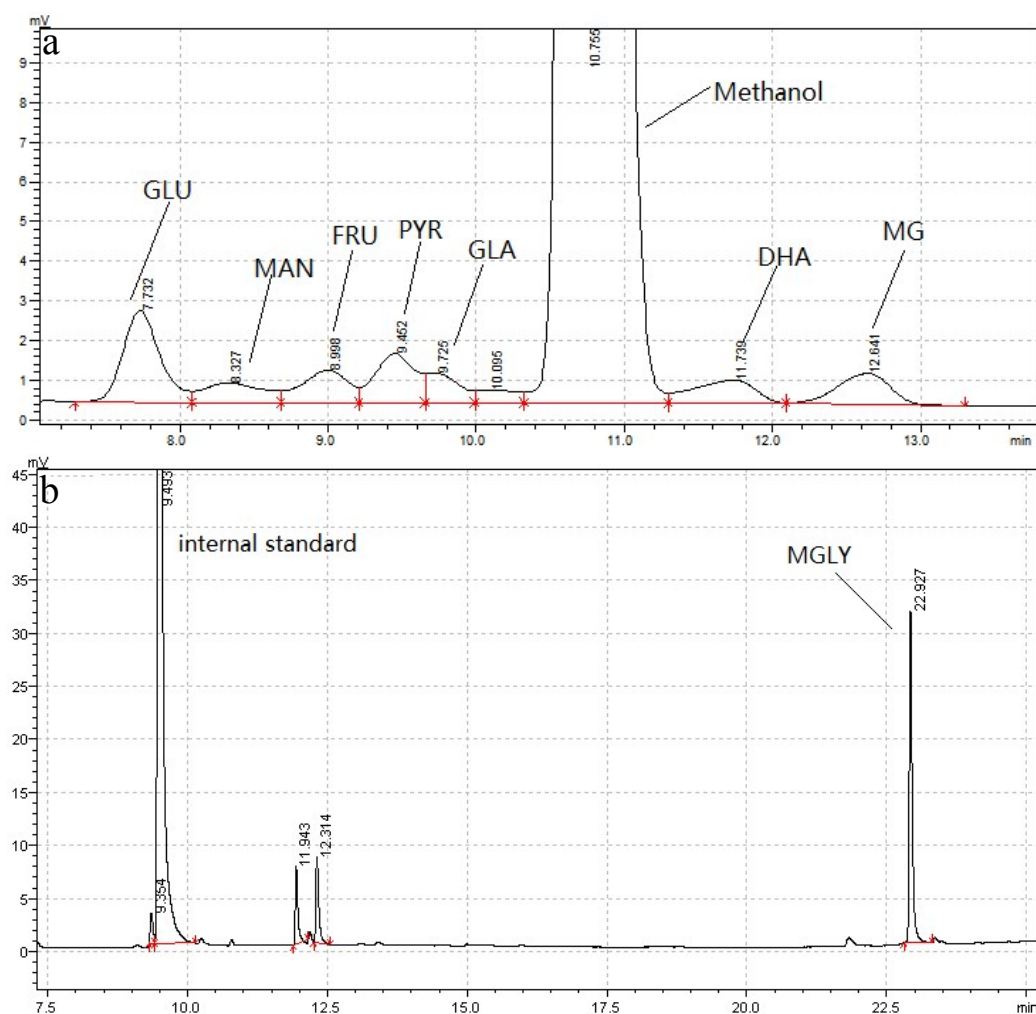

Fig. S2. HPLC (a) and GC (b) chromatograms of the reaction mixture of FRU in the presence of  $\text{MoO}_3$  and  $\text{Au/TiO}_2$ . (reaction conditions: 50 mg of FRU, 5 g of methanol, 50 mg of  $\text{MoO}_3$ , 100 mg of  $\text{Au/TiO}_2$  and 3 mg of  $\text{K}_2\text{CO}_3$ , 363 K, 1 MPa  $\text{O}_2$ , 5 h). Internal standard: 1,3,5-trimethylbenzene.

Table S2

Results and product distributions of FRU conversion in the presence of MoO<sub>3</sub> and Au/TiO<sub>2</sub>.

| T.<br>(K) | t.<br>(h) | Conv. <sub>Retro-aldol</sub><br>(mol%) | Product yield (C mol%) |     |        |     |      | Carbon<br>balance (mol%) |
|-----------|-----------|----------------------------------------|------------------------|-----|--------|-----|------|--------------------------|
|           |           |                                        | GLA                    | DHA | PYR+ML | MG  | MGLY |                          |
| 353       | 5         | 73.9                                   | 3.1                    | 7.7 | 9.6    | 5.4 | 22.3 | 74.2                     |
| 363       | 1         | 45.7                                   | 2.2                    | 5.2 | 7.3    | 3.9 | 9.8  | 82.7                     |
|           | 3         | 72.4                                   | 3.6                    | 7.1 | 7.6    | 7.1 | 20.9 | 73.9                     |
|           | 5         | 85.3                                   | 2.4                    | 8.9 | 9.1    | 7.7 | 27.6 | 70.4                     |
|           | 6         | 87.2                                   | 1.7                    | 8.2 | 10.7   | 7.8 | 27.4 | 68.6                     |

Reaction condition: 50 mg of FRU, 5 g of methanol, 50 mg of MoO<sub>3</sub>, 100 mg of Au/TiO<sub>2</sub> and 3 mg of K<sub>2</sub>CO<sub>3</sub>, 1 MPa O<sub>2</sub>. Yields (Y.) of all products are calculated by carbon atom yield from FRU. Carbon balance is calculated by  $[1 - \text{Conv.}_{\text{Retro-aldol}} + Y_{\text{GLA}} + Y_{\text{DHA}} + Y_{\text{PYR+ML}} + Y_{\text{MG}} + Y_{\text{MGLY}}] \times 100\%$ .

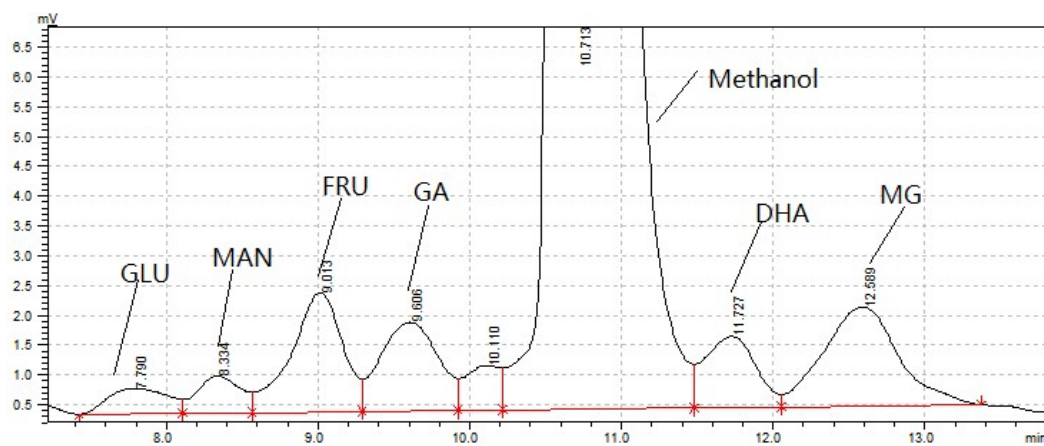

Fig. S3. HPLC chromatogram of the reaction mixture of MAN in the presence of  $\text{MoO}_3$  and  $\text{Au/TiO}_2$ . (reaction conditions: 50 mg of MAN, 5 g of methanol, 37.5 mg of  $\text{MoO}_3$ , 80 mg of  $\text{Au/TiO}_2$ , 393 K, 1 MPa  $\text{O}_2$ , 5 h).

Table S3

Results and product distributions of MAN/GLU conversion in the presence of MoO<sub>3</sub> and Au/TiO<sub>2</sub>.

| Substrate        | T.<br>(K) | t.<br>(h) | Conv. <sub>Retro-aldol</sub><br>(mol%) | Product yield (C mol%) |     |      | Carbon<br>balance (mol%) |
|------------------|-----------|-----------|----------------------------------------|------------------------|-----|------|--------------------------|
|                  |           |           |                                        | GA                     | DHA | MG   |                          |
| MAN <sup>a</sup> | 373       | 1         | 22.8                                   | 3.8                    | 2.2 | 11.9 | 95.1                     |
|                  |           | 2         | 41.9                                   | 8.9                    | 3.1 | 21.4 | 91.5                     |
|                  |           | 3         | 53.8                                   | 11.2                   | 4.8 | 27.2 | 89.4                     |
|                  |           | 4         | 55.2                                   | 5.2                    | 7.5 | 31.2 | 88.7                     |
|                  |           | 5         | 55.8                                   | 2.1                    | 8.9 | 32.3 | 87.5                     |
| MAN <sup>b</sup> | 393       | 1         | 72.5                                   | 17.2                   | 9.1 | 24.2 | 78.0                     |
|                  |           | 2         | 77.8                                   | 10.5                   | 9.4 | 32.7 | 74.8                     |
|                  |           | 3         | 79.7                                   | 8.2                    | 9.2 | 36.2 | 73.9                     |
|                  |           | 4         | 80.2                                   | 4.0                    | 8.8 | 39.2 | 71.8                     |
|                  |           | 5         | 80.3                                   | 3.7                    | 8.9 | 38.4 | 70.7                     |
| GLU <sup>c</sup> | 393       | 1         | 39.5                                   | 3.9                    | 2.5 | 14.2 | 81.1                     |
|                  |           | 2         | 50.8                                   | 4.9                    | 5.0 | 18.8 | 77.9                     |
|                  |           | 3         | 52.5                                   | 4.3                    | 6.3 | 19.6 | 77.7                     |
|                  |           | 4         | 54.2                                   | 3.1                    | 4.4 | 21.0 | 74.3                     |
|                  |           | 5         | 56.9                                   | 4.3                    | 3.1 | 20.7 | 71.2                     |

Reaction conditions <sup>a</sup>: 50 mg of MAN, 5 g of methanol, 50 mg of MoO<sub>3</sub>, 100 mg of Au/TiO<sub>2</sub>, 1 MPa O<sub>2</sub>. Reaction conditions <sup>b</sup>: 50 mg of MAN, 5 g of methanol, 37.5 mg of MoO<sub>3</sub>, 80 mg of Au/TiO<sub>2</sub>, 1 MPa O<sub>2</sub>. Reaction conditions <sup>c</sup>: 50 mg of GLU, 5 g of methanol, 50 mg of MoO<sub>3</sub>, 100 mg of Au/TiO<sub>2</sub>, 1 MPa O<sub>2</sub>. Yields (Y.) of all products are calculated by carbon atom yields from the original hexoses. Carbon balance is calculated by  $[1 - \text{Conv.}_{\text{Retro-aldol}} + Y_{\text{MG}} + Y_{\text{GA}} + Y_{\text{DHA}}] \times 100\%$ .

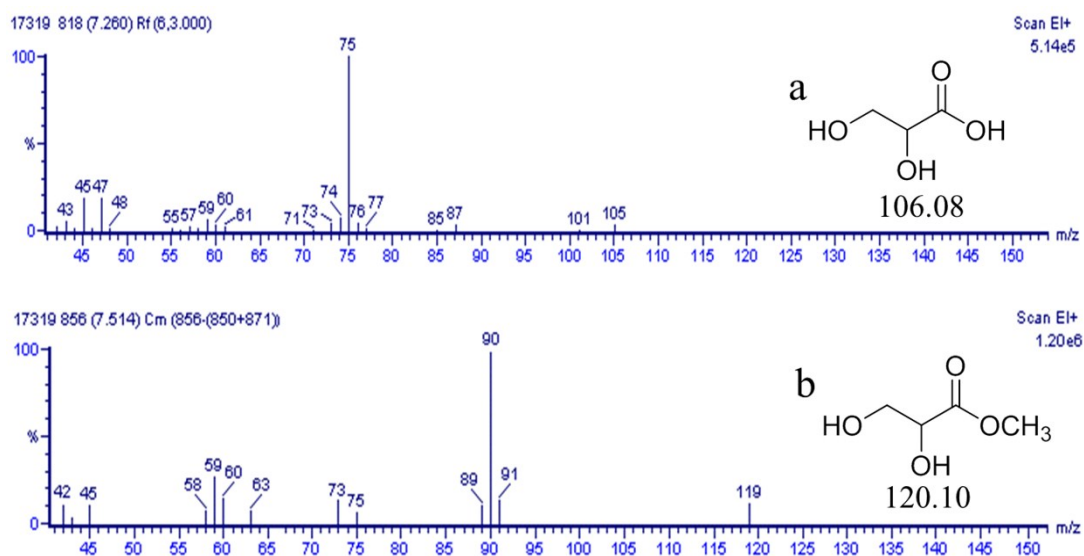

Fig. S4. GC-MS spectra of products from the conversion of FRU to MGLY. (a) glyceric acid, (b) MGLY.



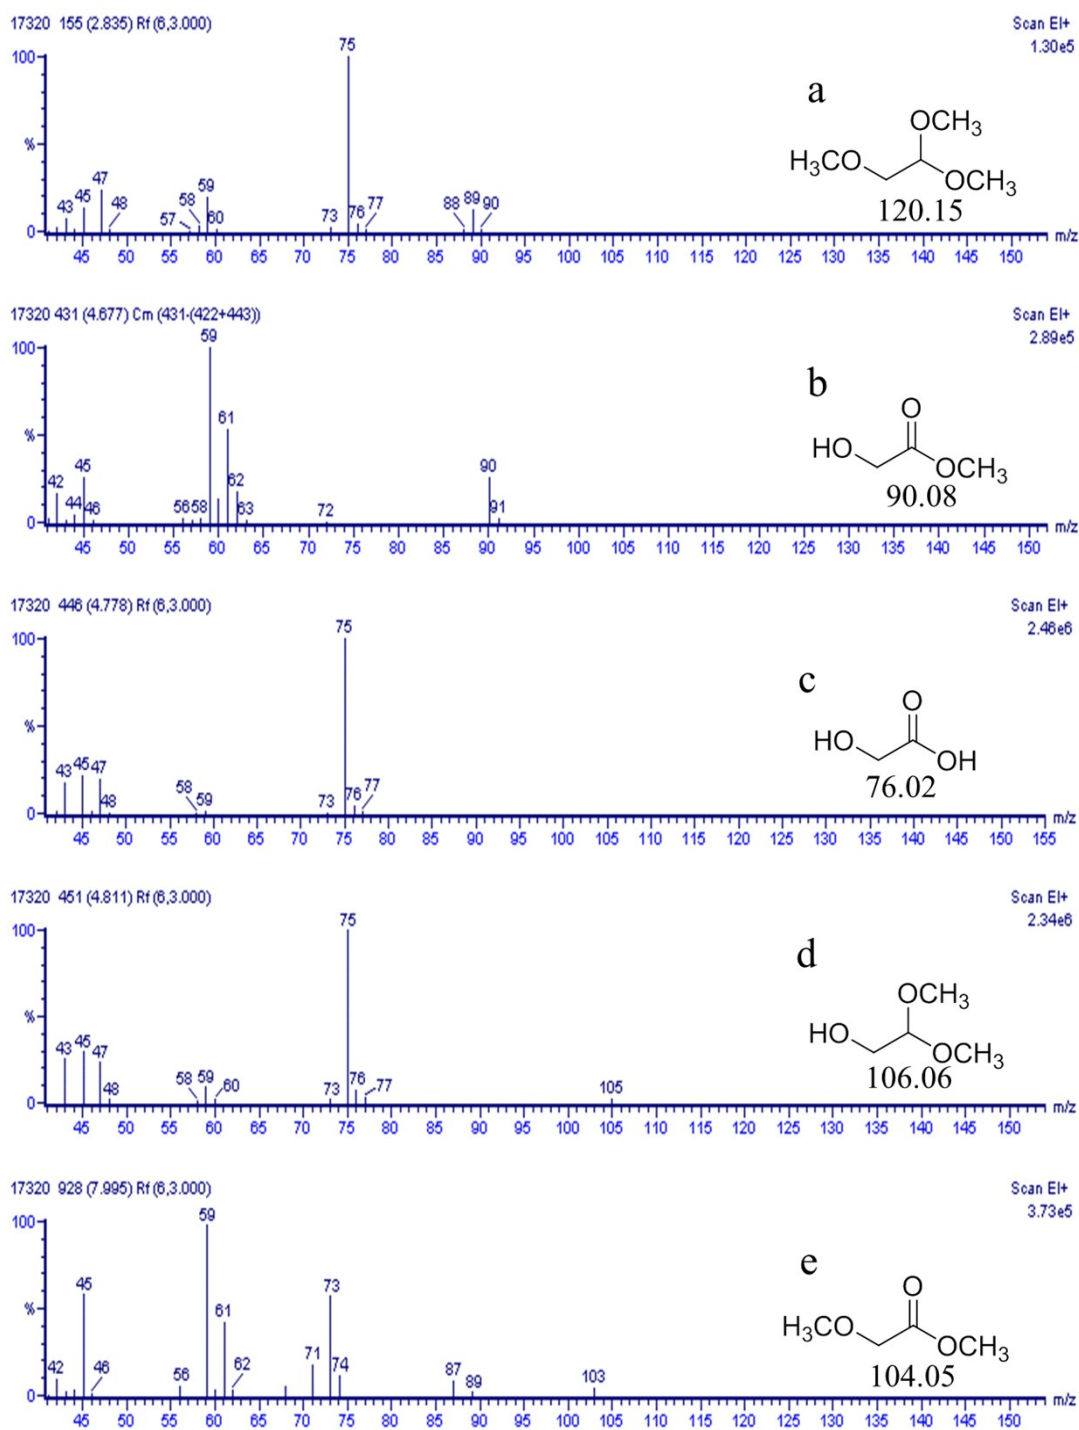

Fig. S5. GC-MS spectra of products from the conversion of MAN to MG. (a) 1,1,2-trimethoxyethane, (b) MG, (c) glycolic acid, (d) 2,2-dimethoxyethanol, (e) methyl methoxyglycolate.

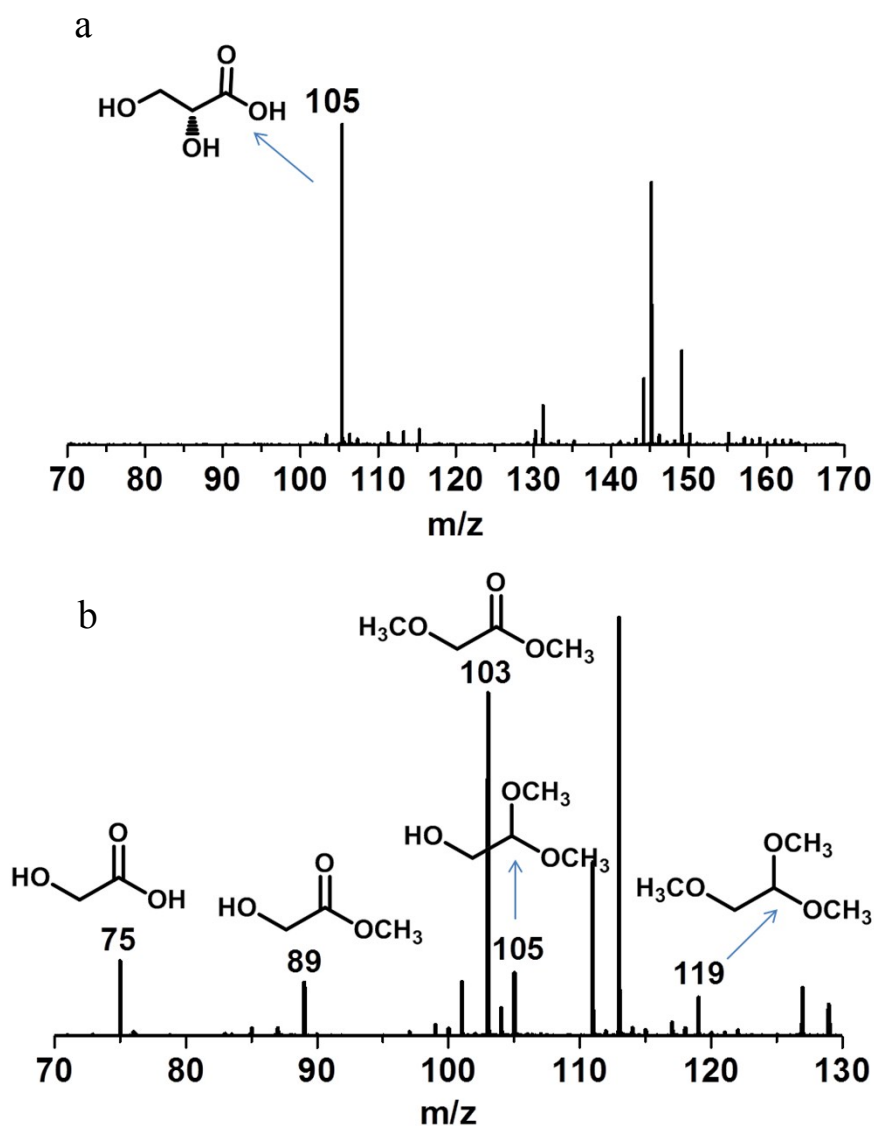

Fig. S6. MS spectra of the reaction solution of FRU (a) and MAN (b) conversion in methanol. Reaction conditions: (a) 50 mg of FRU, 5 g of methanol, 50 mg of  $\text{MoO}_3$ , 100 mg of  $\text{Au/TiO}_2$  and 3 mg of  $\text{K}_2\text{CO}_3$ , 363 K, 1 MPa  $\text{O}_2$ , 4 h; Reaction conditions : (b) 50 mg of MAN, 5 g of methanol, 37.5 mg of  $\text{MoO}_3$ , 80 mg of  $\text{Au/TiO}_2$ , 393 K, 1 MPa  $\text{O}_2$ , 3 h.

Table S4

Conversion of FRU to GLA in methanol under different temperature.

| T.<br>(K) | t.<br>(h) | Conv. <sub>Retro-aldol</sub><br>(mol%) | Product yield (C mol%) |     | Carbon<br>balance (mol%) |
|-----------|-----------|----------------------------------------|------------------------|-----|--------------------------|
|           |           |                                        | PYR+ML+DHA             | GLA |                          |
| 353       | 1         | 17.2                                   | 0.0                    | 0.8 | 83.6                     |
|           | 2         | 24.0                                   | 0.0                    | 2.2 | 78.2                     |
|           | 3         | 33.8                                   | 0.0                    | 3.5 | 69.7                     |
| 363       | 1         | 30.7                                   | 8.2                    | 2.8 | 80.3                     |
|           | 2         | 45.8                                   | 14.2                   | 3.3 | 71.7                     |
|           | 3         | 47.6                                   | 12.7                   | 3.3 | 68.4                     |
| 373       | 1         | 40.2                                   | 11.1                   | 4.8 | 75.7                     |
|           | 2         | 49.8                                   | 14.2                   | 5.3 | 69.7                     |
|           | 3         | 52.5                                   | 13.9                   | 5.2 | 66.6                     |

Reaction condition: 50 mg of FRU, 5 g of methanol, 50 mg of MoO<sub>3</sub>. Yields of products are calculated by carbon atom yield from FRU. Carbon balance is calculated by  $[1 - \text{Conv.}_{\text{Retro-aldol}} + Y_{\text{GLA}} + Y_{\text{PYR+ML+DHA}}] \times 100\%$ .

Table S5

Conversion of GLA to MGLY in methanol under different temperature.

| T.<br>(K) | t.<br>(h) | Conv.<br>(mol%) | Product yield (C mol%) |     |      | Carbon<br>balance (mol%) |
|-----------|-----------|-----------------|------------------------|-----|------|--------------------------|
|           |           |                 | Others                 | DHA | MGLY |                          |
| 353       | 1         | 68.8            | 14.1                   | 9.3 | 40.9 | 95.5                     |
|           | 2         | 89.7            | 23.0                   | 8.1 | 44.8 | 86.2                     |
|           | 3         | 94.3            | 26.5                   | 6.5 | 44.5 | 83.2                     |
| 363       | 1         | 79.1            | 23.9                   | 7.9 | 41.3 | 94.0                     |
|           | 2         | 92.0            | 30.9                   | 7.7 | 46.1 | 92.7                     |
|           | 3         | 96.1            | 32.2                   | 6.1 | 47.3 | 89.5                     |
| 373       | 1         | 88.1            | 35.6                   | 3.2 | 41.5 | 92.2                     |
|           | 2         | 94.6            | 37.1                   | 2.3 | 45.3 | 90.1                     |
|           | 3         | 98.2            | 37.9                   | 0.8 | 48.2 | 88.7                     |

Reaction condition: 50 mg of GLA, 5 g of methanol, 100 mg of Au/TiO<sub>2</sub>, 1 MPa O<sub>2</sub>.

Yields of products are calculated by carbon atom yield from GLA. Carbon balance is calculated by  $[1 - \text{Conv.} + Y_{\text{MGLY}} + Y_{\text{DHA}} + Y_{\text{Others}}] \times 100\%$ , others: GLU, MAN, FRU, PYR, ML, MG.

Table S6

Direct conversion of MAN to GA in methanol under different temperature.

| T.<br>(K) | t.<br>(h) | Conv. <sub>Retro-aldol</sub><br>(mol%) | Yield of GA<br>(C mol%) | Carbon<br>balance (mol%) |
|-----------|-----------|----------------------------------------|-------------------------|--------------------------|
| 373       | 1         | 10.3                                   | 3.7                     | 93.4                     |
|           | 2         | 25.4                                   | 17.2                    | 91.8                     |
|           | 3         | 39.1                                   | 30.1                    | 91.0                     |
| 393       | 1         | 71.2                                   | 45.4                    | 74.2                     |
|           | 2         | 73.6                                   | 38.6                    | 65.0                     |
|           | 3         | 75.2                                   | 36.9                    | 61.7                     |

Reaction condition: 50 mg of MAN, 5 g of methanol, 50 mg of MoO<sub>3</sub>. Yield of GA is calculated by carbon atom yield from MAN. Carbon balance is calculated by  $[1 - \text{Conv.}_{\text{Retro-aldol}} + Y_{\text{GA}}] \times 100\%$ .

Table S7

Conversion of GA to MG under different temperature.

| T.<br>(K) | t.<br>(h) | Conv.<br>(mol%) | Product yield (C mol%) |      | Carbon<br>balance (mol%) |
|-----------|-----------|-----------------|------------------------|------|--------------------------|
|           |           |                 | Others                 | MG   |                          |
| 353       | 1         | 82.3            | 8.4                    | 71.6 | 97.7                     |
|           | 2         | 95.4            | 9.3                    | 78.2 | 92.1                     |
|           | 3         | 98.8            | 8.7                    | 80.9 | 90.8                     |
| 373       | 1         | 95.7            | 7.9                    | 86.9 | 99.1                     |
|           | 2         | 96.3            | 4.9                    | 88.7 | 97.3                     |
|           | 3         | 99.1            | 4.6                    | 90.2 | 95.7                     |
| 393       | 0.5       | 97.4            | 9.6                    | 82.7 | 94.9                     |
|           | 1         | 98.8            | 5.5                    | 84.8 | 91.5                     |
|           | 1.5       | 98.8            | 5.3                    | 81.1 | 87.6                     |
| 413       | 0.5       | 98.2            | 6.9                    | 78.3 | 87.0                     |
|           | 1         | 99.7            | 2.1                    | 72.4 | 74.8                     |
|           | 1.5       | 100.0           | 0.0                    | 68.7 | 68.7                     |

Reaction condition: 50 mg of GA, 5 g of methanol, 100 mg of Au/TiO<sub>2</sub>, 1 MPa O<sub>2</sub>.

Yields of MG and others are calculated by carbon atom yield from GA. Carbon balance is calculated by  $[1 - \text{Conv.} + Y_{\text{MG}} + Y_{\text{Others}}] \times 100\%$ , others: FRU, PYR, DHA.

Table S8

Conversion of MAN to MG catalyzed by MoO<sub>3</sub>.

| Cat.             | t.<br>(h) | Conv. <sub>Retro-aldol</sub><br>(mol%) | Product yield (C mol%) |      |      | Carbon<br>balance (mol%) |
|------------------|-----------|----------------------------------------|------------------------|------|------|--------------------------|
|                  |           |                                        | DHA                    | GA   | MG   |                          |
| MoO <sub>3</sub> | 1         | 65.2                                   | 3.4                    | 39.7 | 0.9  | 78.8                     |
|                  | 3         | 73.6                                   | 5.5                    | 32.6 | 2.8  | 77.3                     |
|                  | 5         | 77.5                                   | 8.4                    | 29.7 | 8.9  | 69.5                     |
|                  | 9         | 92.9                                   | 8.3                    | 17.3 | 10.8 | 43.5                     |

Reaction condition : 50 mg of MAN, 5 g of methanol, 50 mg of MoO<sub>3</sub>, 1 MPa O<sub>2</sub>, 393 K; Yields (Y.) of all products are calculated by carbon atom yields from the mannose and the corresponding carbon balance is calculated by  $[1 - \text{Conv.}_{\text{Retro-aldol}} + Y_{\text{DHA}} + Y_{\text{GA}} + Y_{\text{MG}}] \times 100\%$ .

Table S9

Effect of mass ratio of MoO<sub>3</sub> to Au/TiO<sub>2</sub> on the yield of MGLY in methanol.

| MoO <sub>3</sub> :Au/TiO <sub>2</sub><br>(mg:mg) | Conv. <sub>Retro-aldol</sub><br>(mol%) | Y. <sub>MGLY</sub><br>(C mol%) | Selec. <sub>MGLY</sub><br>(C mol%) | Carbon<br>balance (mo%) |
|--------------------------------------------------|----------------------------------------|--------------------------------|------------------------------------|-------------------------|
| 50:50                                            | 83.2                                   | 21.2                           | 25.5                               | 68.5                    |
| 50:100                                           | 85.3                                   | 27.6                           | 32.4                               | 70.4                    |
| 25:100                                           | 53.4                                   | 18.1                           | 33.9                               | 90.3                    |

Reaction condition: 50 mg of FRU, 5 g of methanol, 3 mg of K<sub>2</sub>CO<sub>3</sub>, 363 K, 1 Mpa O<sub>2</sub>, 5 h. Yield (Y.) of MGLY is calculated by carbon atom yield from FRU. Selectivity (Selec.) of MGLY is calculated by  $Y_{\text{MGLY}} / \text{Conv.}_{\text{Retro-aldol}} \times 100\%$ . Carbon balance is calculated by  $[1 - \text{Conv.}_{\text{Retro-aldol}} + Y_{\text{MGLY}} + Y_{\text{others}}] \times 100\%$ , others: GLA, DHA, PYR, ML.



Table S10

Effect of mass ratio of MoO<sub>3</sub> to Au/TiO<sub>2</sub> on the yield of MG in methanol.

| MoO <sub>3</sub> :Au/TiO <sub>2</sub><br>(mg:mg) | Conv. <sub>Retro-aldol</sub><br>(mol%) | Y. <sub>MG</sub><br>(C mol%) | Selec. <sub>MG</sub><br>(C mol%) | Carbon<br>balance (mol%) |
|--------------------------------------------------|----------------------------------------|------------------------------|----------------------------------|--------------------------|
| 50.0:100                                         | 80.1                                   | 37.1                         | 46.3                             | 65.0                     |
| 37.5:100                                         | 79.5                                   | 36.2                         | 45.5                             | 70.0                     |
| 25.0:100                                         | 77.4                                   | 28.9                         | 37.3                             | 65.4                     |
| 12.5:100                                         | 74.3                                   | 27.7                         | 37.2                             | 71.5                     |
| 37.5:80                                          | 80.2                                   | 39.2                         | 48.9                             | 71.8                     |
| 37.5:60                                          | 72.9                                   | 28.2                         | 38.7                             | 73.7                     |
| 37.5:40                                          | 73.6                                   | 23.2                         | 31.5                             | 76.8                     |

Reaction condition: 50 mg of MAN, 5 g of methanol, 393 K, 1 Mpa O<sub>2</sub>, 4 h. Yield (Y.) of MG is calculated by carbon atom yield from MAN. Selectivity (Selec.) of MG is calculated by  $Y_{MG}/Conv_{Retro-aldol} \times 100\%$ . Carbon balance is calculated by  $[1 - Conv_{Retro-aldol} + Y_{MG} + Y_{GA} + Y_{DHA}] \times 100\%$ .

Table S11

Effect of FRU concentration on the yield of MGLY in methanol.

| C <sub>FRU</sub><br>(wt%) | Conv. <sub>Retro-aldol</sub><br>(mol%) | Y <sub>MGLY</sub><br>(C mol%) | Selec. <sub>MGLY</sub><br>(C mol%) | Carbon<br>balance (mol%) |
|---------------------------|----------------------------------------|-------------------------------|------------------------------------|--------------------------|
| 1.0                       | 85.3                                   | 27.6                          | 32.4                               | 70.4                     |
| 2.0                       | 79.7                                   | 25.2                          | 31.6                               | 74.8                     |
| 5.0                       | 75.3                                   | 21.7                          | 28.8                               | 71.6                     |
| 10.0                      | 68.9                                   | 18.3                          | 26.6                               | 79.7                     |

Reaction condition: 5 g of methanol, 50 mg of MoO<sub>3</sub>, 100 mg of Au/TiO<sub>2</sub>, 3 mg of K<sub>2</sub>CO<sub>3</sub>, 363 K, 1 Mpa O<sub>2</sub>, 5 h. Yield (Y.) of MGLY is calculated by carbon atom yield from FRU. Selectivity (Selec.) of MGLY is calculated by  $Y_{MGLY}/Conv_{Retro-aldol} \times 100\%$ . Carbon balance is calculated by  $[1 - Conv_{Retro-aldol} + Y_{MGLY} + Y_{others}] \times 100\%$ , others: GLA, DHA, PYR, ML.

Table S12

Effect of MAN concentration on the yield of MG in methanol.

| $C_{\text{MAN}}$<br>(wt%) | Conv. <sub>Retro-aldol</sub><br>(mol%) | $Y_{\text{MG}}$<br>(C mol%) | Selec. <sub>MG</sub><br>(C mol%) | Carbon<br>balance (mol%) |
|---------------------------|----------------------------------------|-----------------------------|----------------------------------|--------------------------|
| 1.0                       | 80.2                                   | 39.2                        | 48.9                             | 71.8                     |
| 2.0                       | 75.7                                   | 39.8                        | 52.6                             | 78.7                     |
| 5.0                       | 72.5                                   | 29.1                        | 40.1                             | 70.7                     |
| 10.0                      | 63.9                                   | 20.7                        | 32.4                             | 72.6                     |

Reaction condition: 5 g of methanol, 37.5 mg of MoO<sub>3</sub>, 80 mg of Au/TiO<sub>2</sub>, 393 K, 1 Mpa O<sub>2</sub>, 4 h. Yield (Y.) of MG is calculated by carbon atom yield from MAN. Selectivity (Selec.) of MG is calculated by  $Y_{\text{MG}}/\text{Conv.}_{\text{Retro-aldol}} \times 100\%$ . Carbon balance is calculated by  $[1 - \text{Conv.}_{\text{Retro-aldol}} + Y_{\text{MG}} + Y_{\text{GA}} + Y_{\text{DHA}}] \times 100\%$ .

Table S13

Reuse of MoO<sub>3</sub> and Au/TiO<sub>2</sub> catalysts.

| Reuse           | Conv. <sub>Retro-aldol</sub><br>(mol%) | Y. <sub>GA</sub><br>(C mol%) | Y. <sub>MG</sub><br>(C mol%) | Selec. <sub>MG</sub><br>(C mol%) | Carbon<br>balance (mol%) |
|-----------------|----------------------------------------|------------------------------|------------------------------|----------------------------------|--------------------------|
| 1 <sup>st</sup> | 80.2                                   | 4.0                          | 39.2                         | 48.9                             | 71.8                     |
| 2 <sup>nd</sup> | 74.4                                   | 5.5                          | 37.5                         | 50.4                             | 78.9                     |
| 3 <sup>rd</sup> | 70.3                                   | 4.9                          | 34.2                         | 48.6                             | 78.5                     |
| 4 <sup>th</sup> | 71.6                                   | 6.7                          | 30.7                         | 42.9                             | 75.1                     |

Reaction condition: 100 mg of MAN, 5 g of methanol, 37.5 mg of MoO<sub>3</sub>, 80 mg of Au/TiO<sub>2</sub>, 393 K, 1 Mpa O<sub>2</sub>, 4 h. Yield (Y.) of MG is calculated by carbon atom yield from MAN. Selectivity (Selec.) of MG is calculated by  $Y_{MG}/Conv_{Retro-aldol} \times 100\%$ . Carbon balance is calculated by  $[1 - Conv_{Retro-aldol} + Y_{MG} + Y_{GA} + Y_{DHA}] \times 100\%$ .

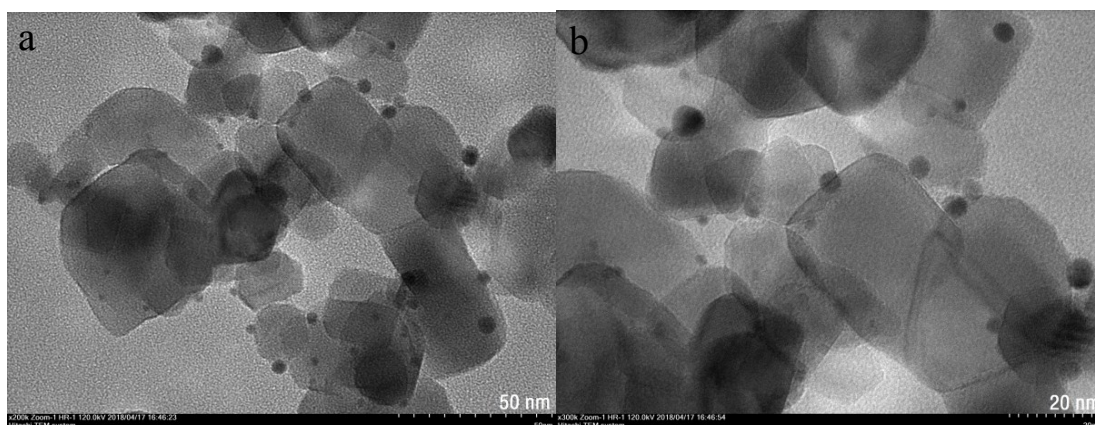

Fig. S7. TEM images of Au/TiO<sub>2</sub> catalyst after the fourth cycle.

|                                                                                                                                                                                              |                                                                                                                                                                                                              |                                                                                                                                                                                                                        |                                                                                                                                                                                                                                                         |
|----------------------------------------------------------------------------------------------------------------------------------------------------------------------------------------------|--------------------------------------------------------------------------------------------------------------------------------------------------------------------------------------------------------------|------------------------------------------------------------------------------------------------------------------------------------------------------------------------------------------------------------------------|---------------------------------------------------------------------------------------------------------------------------------------------------------------------------------------------------------------------------------------------------------|
| $  \begin{array}{c}  9.72 \text{ H} \\  \diagup \quad \diagdown \\  \text{C}=\text{O} \\    \\  3.65 \text{ HO} - \text{C} - \text{H} \quad 4.64 \\    \\  \text{H} \\  4.64  \end{array}  $ | $  \begin{array}{c}  4.46 \\  \text{H} \\    \\  3.65 \text{ HO} - \text{C} - \text{OCH}_3 \quad 3.50 \\    \\  3.65 \text{ HO} - \text{C} - \text{H} \quad 3.58 \\    \\  \text{H} \\  3.43  \end{array}  $ | $  \begin{array}{c}  4.28 \\  \text{H} \\    \\  3.50 \text{ H}_3\text{CO} - \text{C} - \text{OCH}_3 \quad 3.50 \\    \\  3.65 \text{ HO} - \text{C} - \text{H} \quad 3.43 \\    \\  \text{H} \\  3.43  \end{array}  $ | $  \begin{array}{c}  9.72 \text{ H} \\  \diagup \quad \diagdown \\  \text{C}=\text{O} \\    \\  4.37 \text{ H} - \text{C} - \text{OH} \quad 3.23 \\    \\  3.65 \text{ HO} - \text{C} - \text{H} \quad 3.63 \\    \\  \text{H} \\  3.48  \end{array}  $ |
|----------------------------------------------------------------------------------------------------------------------------------------------------------------------------------------------|--------------------------------------------------------------------------------------------------------------------------------------------------------------------------------------------------------------|------------------------------------------------------------------------------------------------------------------------------------------------------------------------------------------------------------------------|---------------------------------------------------------------------------------------------------------------------------------------------------------------------------------------------------------------------------------------------------------|

Fig. S8. Predict of  $^1\text{H}$ -NMR shifts of GA and its hemiacetal, acetal as well as GLA.

Table S14

Conversion of GA in methanol.

| time  | Con. <sub>GA</sub> in HPLC | Acetal product inGC |
|-------|----------------------------|---------------------|
| [min] | [mol %]                    | [C mol %]           |
| 40    | 5.5                        | 82.1                |
| 80    | 2.7                        | 94.4                |

Reaction condition: 100 mg of GA, 5 g of methanol, 463 K.
